# Supplementary material
Source: PubMed Central journal article supplement (PMC3607063)
Supplement: 1221997110_pnas.201221997SI.pdf [file 1221997110_pnas.201221997SI.pdf]

# Supporting Information

Hoshi et al. 10.1073/pnas.1221997110

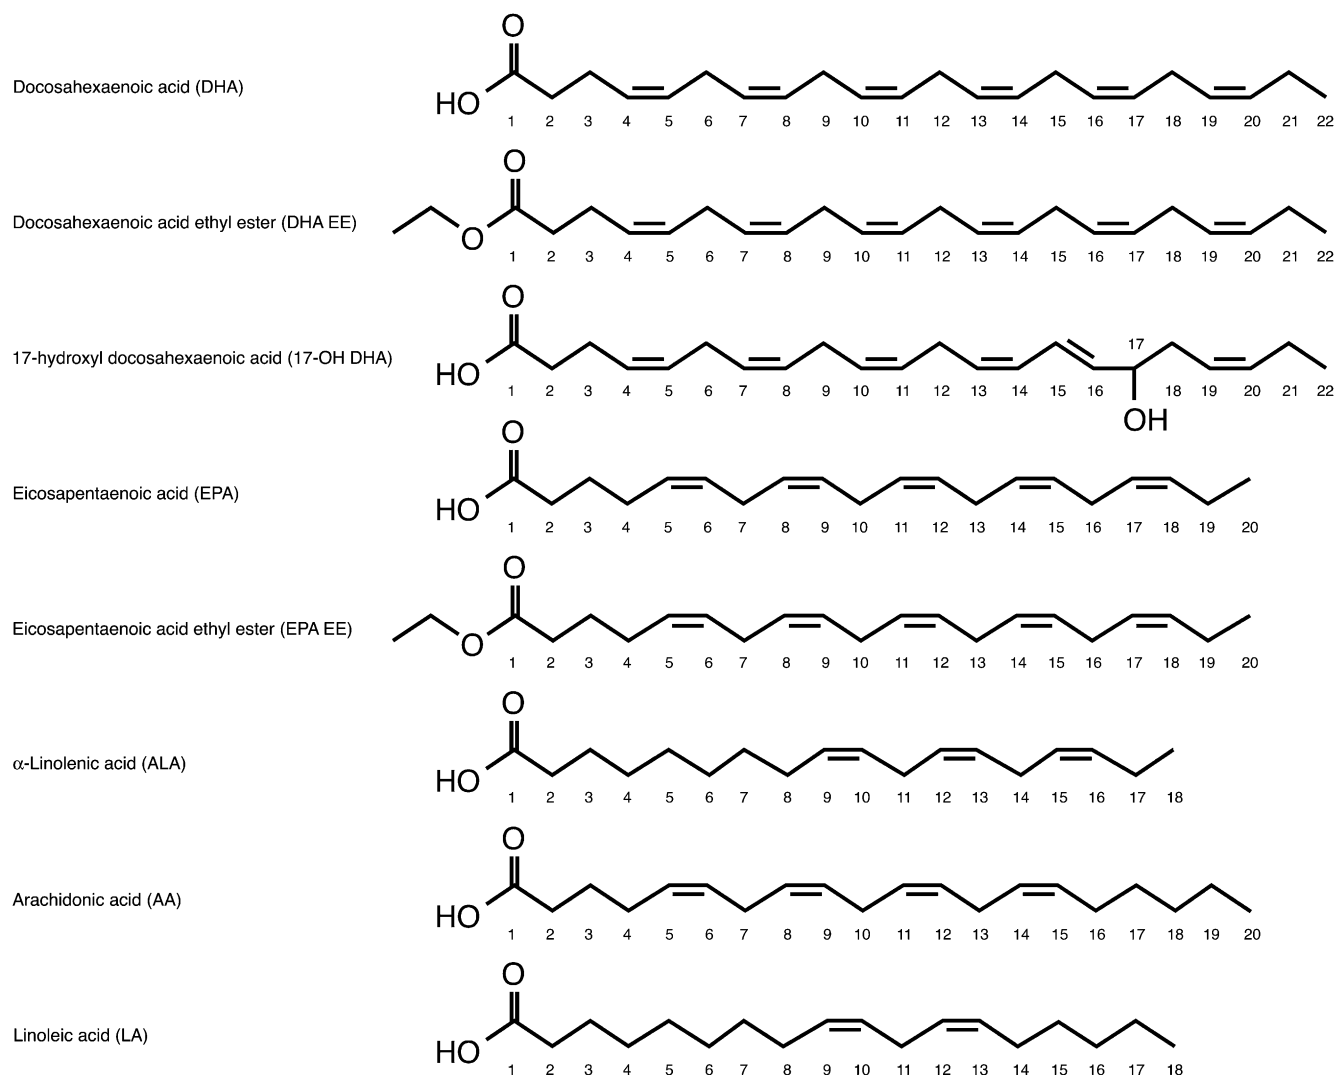

Fig. S1. Structures of the omega-3 fatty acids, omega-6 fatty acids, and their derivatives used in the study.

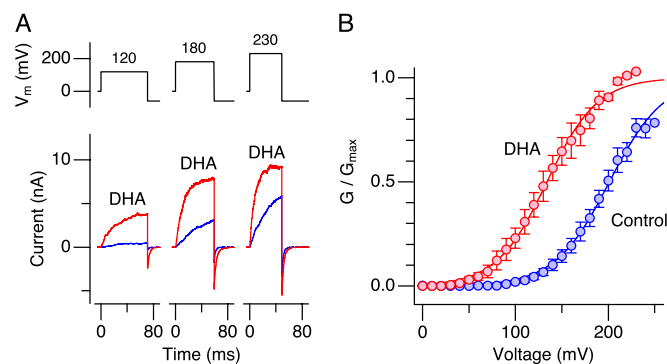

**Fig. S2.** Docosahexaenoic acid (DHA) enhances currents through divalent-insensitive Slo1+β1 channels. (A) Representative currents through Ca<sup>2+</sup>- and Mg<sup>2+</sup>-insensitive Slo1 D362A:D367A:E399A:Δ894–895+β1 channels before and after application of DHA (3 μM). (B) Normalized conductance in Slo1 D362A:D367A:E399A:Δ894–895+β1 channels. Curves represent Boltzmann fits with  $V_{0.5} = 201.1 \pm 1.5$  mV and  $Q_{app} = 0.85 \pm 0.04$  (control) and  $V_{0.5} = 133.9 \pm 1.9$  mV and  $Q_{app} = 0.92 \pm 0.06$  (DHA, 3 μM).  $n = 5$ . All results were obtained without Ca<sup>2+</sup>.

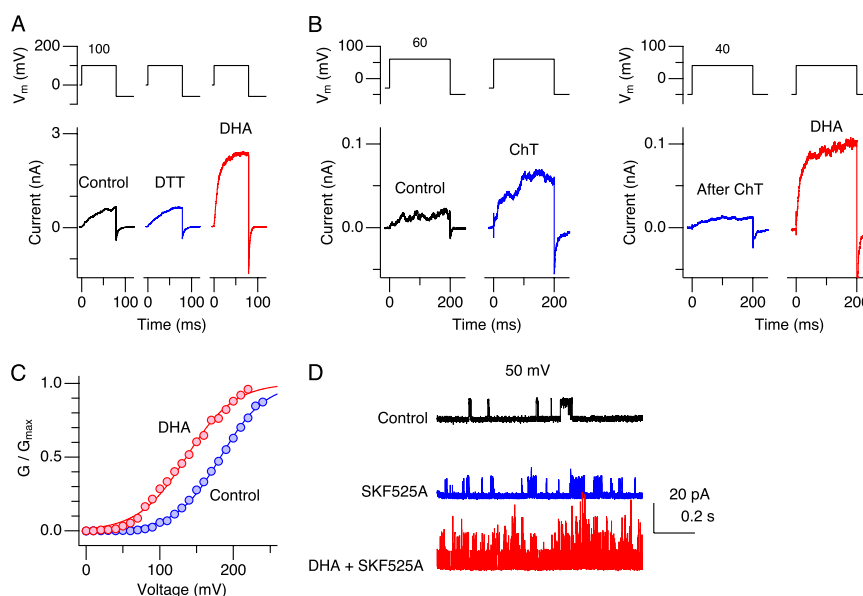

**Fig. S3.** Neither a redox change or an intracellular signaling cascade is likely to be involved in the stimulatory effect of DHA on Slo1+β1 channels. (A) Pretreatment with the reducing agent DTT does not antagonize the effect of DHA. Channels were treated with DTT (2 mM) for 4.5 min before DHA (3 μM) was applied. (B) Treatment with the oxidant chloramine-T (ChT) (100 μM) increases currents (*Left*) but does not impair the stimulatory effect of subsequent application of DHA (3 μM; *Right*). Note that the test voltages are different to account for the shift in normalized conductance by ChT. (C) DHA (3 μM) remains effective in shifting  $V_{0.5}$  in a patch taken from a cell preincubated with the P450 epoxygenase inhibitor SKF525A (Enzo; 30 μM) for 1 h. (D) The presence of SKF525A (10 μM) does not impair the ability of DHA (3 μM) to increase  $P_o$ . P450 epoxygenase generates epoxyeicosatrienoic acids from long-chain polyunsaturated fatty acids. All results were obtained without Ca<sup>2+</sup>.

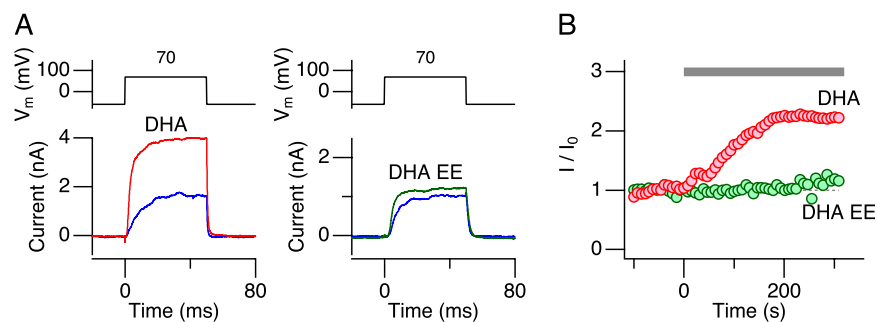

**Fig. S4.** Contrasting effects of DHA and DHA EE applied to the extracellular side in the whole-cell configuration. (A) Representative currents at 70 mV before and after application of DHA (3  $\mu$ M; *Left*) or DHA EE (3  $\mu$ M; *Right*). Mouse neuroblastoma cells (Neuro-2a from ATCC) were transfected with Slo1+ $\beta$ 1. (B) Fractional changes in peak outward current size by DHA (red) and DHA EE (green). Currents were elicited by pulses from  $-60$  to  $-70$  mV every 8 s. Extracellular solution contained (in millimolars): 134 NaCl, 6 KCl, 2 CaCl<sub>2</sub>, 1 MgCl<sub>2</sub>, 10 glucose, 10 Hepes, pH 7.4 [with *N*-methyl-D-glucamine (NMG)]. Intracellular solution contained (in millimolars): 110 K aspartate, 30 KCl, 10 NaCl, 2 MgCl<sub>2</sub>, 10 Hepes, pH 7.2 (with NMG). Similar results were obtained from three cells with each compound.
